# Supplementary material for: Mutation of Perinatal Myosin Heavy Chain Associated with a Carney Complex Variant
Source: Atypon-hosted journal article supplement (doi:10.1056/nejmoa040584), 2004-07-28
Supplement: 460sa1.pdf [file 460sa1.pdf]

## Supplementary Appendix

This appendix has been provided by the authors to give readers additional information about their work.

Supplement to: Veugelers M, Bressan M, McDermott DA, et al. Mutation of perinatal myosin heavy chain associated with a Carney complex variant. *N Engl J Med* 2004;351:460-9.

## Supplementary Appendix

This appendix has been provided by the authors to give readers additional information about their work.

**Supplementary Table 1. Primers used to amplify genomic segments of myosin heavy chain genes.**

| Gene        | Exon(s)     | Forward (5'-3')            | Reverse (5'-3')             |                         |
|-------------|-------------|----------------------------|-----------------------------|-------------------------|
| <i>MYH1</i> | 1-2         | tgtgaatctaattggccagttct    | tttgatggggaccttaatcatc      |                         |
|             | 3           | tctttctcacggtcttactca      | tcacctctgctgaacaacca        |                         |
|             | 4           | aaacccactgaatacatgaca      | taaagctaaaccaatatctagtcca   |                         |
|             | 5-7         | tgaaaagaaagatgtaaaggctct   | acaagcatgtttggcagcag        |                         |
|             | 8-10        | tgaaatctcaagaggccagtg      | ccatcaggagctcagctgtaa       |                         |
|             | 11-12       | tcagatgtaccacacacagac      | cccttccataagtactacagg       |                         |
|             | 13          | aggacaaaacgataccatcct      | ttggcaaaataaggaattctcc      |                         |
|             | 14          | ggatgaatttactcagatgggata   | tgacctcaggcaatctacc         |                         |
|             | 15          | gggcaaccaagagtgaaact       | tctcgttgagtcacatcagttct     |                         |
|             | 16-17       | aaaatttcatctggatactattcatt | cctctgtttattcaaaggacttca    |                         |
|             | 18-20       | cccagtggctatgtgtttct       | tcataatctgtcccttatttggtag   |                         |
|             | 21-22       | aaaattaacctgaaggcttaaaaca  | tcctcattcataggaggcactt      |                         |
|             | 23-24       | gaatggaatcaatgggacaaa      | ctgcctcgattcctcctc          |                         |
|             | 25          | aacaagcccttggtatgcag       | atgagaaaaagggtgcctga        |                         |
|             | 26          | cccttgctggtttgtttgt        | tgtgttcataattagtggggatct    |                         |
|             | 27-28       | catgcctccatcaagttc         | tggtctgtatatggtcccagaa      |                         |
|             | 29          | tctgattgtggaattcactctct    | gacagctgctgatgggtaag        |                         |
|             | 30-31       | tcagtcccagaacacctcaa       | tccttagttcatggagcaaa        |                         |
|             | 33-33       | gaaatgcaaaggcatgaaaa       | tttaaactttatccttcatgaaatctt |                         |
|             | 34-37       | cggccagttgattgtcttta       | tggacctccatgtagccatt        |                         |
|             | 38          | aaattcaagatccactgacctaaag  | agtacaaaatggagtgacaaaagatt  |                         |
|             | <i>MYH3</i> | 2                          | gctgaaacaggcctggag          | gctggaaccacatctggaag    |
|             |             | 3                          | gacgtgcagaccatcttagtg       | ccctgcccgcataatctaat    |
|             |             | 4                          | aaggcaaggggttttccat         | ctgggagtaaggggcaact     |
|             |             | 5                          | gggtagaatcgggaagctct        | gccagcctgatcttttatta    |
|             |             | 6                          | tgacatcctgaaaagcctgt        | ccccctcattctgaggtaag    |
|             |             | 7                          | cctgggcaacaagagtgtaa        | ctttgaggacagggtcttg     |
|             |             | 8-9                        | cccataagatgaataggaactattgg  | aaactttccctgttgactgtaga |
|             |             | 10-11                      | agtccactgggtgggtttt         | gtgcctggctggattaattg    |
|             |             | 12-13                      | ccaacctttgaaacttctgga       | tcataaaaccaatttccctca   |
|             |             | 14                         | ggaatgttgacagtctttgattc     | tgacagtaatgagcagaagagtc |
|             |             | 15                         | cccaccgtaagctcttctca        | gtggaacaaatggagggaaa    |
|             |             | 16                         | tccatgtgatttccctccat        | agaatctcagcattgctcattta |
|             |             | 17-18                      | tcattacaatggatctctgtcttca   | cctctcaaattccagttctg    |
|             |             | 19-20                      | ggaagagaggcctgaactaca       | tttctgagagagactccccttc  |
|             |             | 21                         | acacaagctgtgtgcagagg        | gcaaaatcccaccaataa      |
|             | 22          | aatactggaatgtcgcaaac       | cctaagaagaattcgcaagca       |                         |
|             | 23          | gaagcatgccacagagaaca       | ttccttttgggaacaaatgc        |                         |

---

|             |       |                           |                            |
|-------------|-------|---------------------------|----------------------------|
|             | 24-25 | agaactccaggggtggaag       | cagcaccagctcactgtaa        |
|             | 26    | agcctgttcttggcaatcag      | tcaatgaccacggagtgtgt       |
|             | 27    | gacacactccgtggcattg       | ccttggtttggccagctac        |
|             | 28    | cttagcacagtgcctacaca      | ccttctgaatgaagtgccttt      |
|             | 29    | ggtggtgatagaaggacaca      | cagcaccgcatttaagaca        |
|             | 30    | agtgatgttcaagtggatgaa     | gggatgcattctcctcctc        |
|             | 31    | ggcaagtgatccaagtgtg       | gcatgctctcgagcaataga       |
|             | 32    | tgctttgcatgtctggaac       | gcaaaaatggagacacagca       |
|             | 33    | ctgcagggtagtggagctg       | gccagcctacatttctgag        |
|             | 34    | agatgaggctcgtggtccta      | gtggatgaggctggtgtttct      |
|             | 35    | gaagagaggcgaggtccag       | tgtgagggcttfaatgcaa        |
|             | 36    | tcccaggtttgacagttc        | ggagaggggtgggaaatag        |
|             | 37    | ctgcgctgagctttccag        | tcctgtggtttgatggagaa       |
|             | 38-39 | gaaacactttgcccagaaa       | tctgaggttcctccagctaa       |
|             | 40    | tcccactgaagtaggcaagc      | ttgcatgtgaaaagagtcaca      |
| <i>MYH4</i> | 3     | tgaggaacaagcatggaaa       | ttaacccaaaatgaggcaga       |
|             | 4     | ttgacctggcttttctgct       | gctaacatgtgtagaatgtggagt   |
|             | 5     | aaacaagtgattgctgatcg      | caactatttacaatggctatggaa   |
|             | 6-7   | tgctgtgacctatgtttaagt     | gatgtgcacgtggttagatttt     |
|             | 8-9   | ggtcaatgggaaattattactgc   | tgtaccacaaaagaaaagattctc   |
|             | 10-11 | ttttcactgtggcactctct      | tcttctgccactgctttcc        |
|             | 12    | gctaattggggatgagcaaa      | tgtcagctttgtcaagtggaa      |
|             | 13-14 | aagccatggtcagttccacc      | caagaggattgactggcta        |
|             | 15    | agaatacttgttatgcgtaatttc  | attaagcacaggaggcaag        |
|             | 16    | ttccatcaattacatggagca     | ttggccagtgttttgtgct        |
|             | 17    | aagggaattttggcagtcct      | aaattttctgtttgatggttagtt   |
|             | 18-19 | ggactctcatgctgatgcaa      | tgtgtagactaagacattggaagg   |
|             | 20-21 | tttcagtgaagaaaaccacat     | tgaaagtgtggagcaggaag       |
|             | 22    | cttctgctccacactttca       | ttgcttctttatgcccgagt       |
|             | 23    | tgaccaaacaggtagtcactgaa   | cattgaggtggtgaagactaaag    |
|             | 24-25 | gggttagctcctggttctca      | catgatgtaacattttggagatcttt |
|             | 26-27 | ttgtactactactcctcaacacc   | tgtgtaatttggctaaaaatagtc   |
|             | 28    | agcccccttccacaggtagt      | aatgaatgtacagagcttgagaaa   |
|             | 29-30 | ataagagggttacaatgttattcca | tctttcatgtgtccccaagc       |
|             | 31-33 | tgctttcctagtgcagcagcttt   | ttgtgtattccctaaagatttgc    |
|             | 34    | ttaatgccttcttggggaaa      | tgatttatgacacatagtctcctgt  |
|             | 35    | cttgccgattgctcctatct      | tgaaccagctaggtcccagt       |
|             | 36-39 | tgatcaataattttgcctgtg     | ccaatttaaagaaaacccttaa     |
|             | 40    | tctcattcatgaggcaaatcc     | catttcgtgcatttctttgg       |
| <i>MYH8</i> | 1     | gagtgccagtttgagggaat      | ggcaacaggcttgagatt         |
|             | 2-3   | ggacaatcactgaagcagga      | agctgctgggaagagcataa       |
|             | 4-7   | caagctgtgtttgatctgaactg   | cttcatgcacagcaagggtg       |
|             | 8-10  | ttggagccaaatgtaatgctc     | cccttcacaagtcgcaagtc       |
|             | 11-12 | gattgaattggagaaaaatgga    | ctaggtgcagtgttgagca        |
|             | 13    | ttgaggagcaacgttagttt      | cagtttgtcagatcacaacct      |
|             | 14-15 | cttcttcgagctgtgacctg      | gctgatatttgaagtattcctatt   |

---

---

|       |                         |                          |
|-------|-------------------------|--------------------------|
| 16    | caattgaagcctcacagatgc   | tggtgcaacacaagttcatg     |
| 17    | ctctggtaagacacagagag    | ccaccacaagactatattatcgac |
| 18-19 | ggcagttggatttccacttt    | ttctgaattgggtgagaggaa    |
| 20    | aaaagggaaatttgtgtga     | tgcctttcttcccataga       |
| 21-25 | gctgcatttctccagacat     | gagtagtgctgtaaagtcc      |
| 25    | caaagagttgcaggtgagtc    | tgctgtaaatgctgcaaa       |
| 26    | tccacagagttgatgcctaa    | tccttttgaccttcttagcaa    |
| 27-28 | ggttaggcttattttatgccagt | actgacacagtatgcactcaa    |
| 29-31 | tgtgaaaaggaccaaggag     | ttgccaagttgtcctcataa     |
| 32    | tgacaagagttggctcacg     | cagttacctttgtcgggta      |
| 33    | ccagtacaatctcccagtca    | ccccatccatgtttacatac     |
| 34-36 | cctgcacgaaccaacaagta    | gaaatctgaaggcctcctaa     |
| 37    | ctgccatcatgccaatg       | ttcttcttattgacgcattctc   |
| 38    | cctgattgaggaactaatcctg  | tcataaagcaagtgaccaaaaa   |

---

---

**Supplementary Table 2: Additional primers used for sequencing of *MYH8* amplicons.**

| Amplicon   | Sequence Direction | Primer Sequence (5'-3') |
|------------|--------------------|-------------------------|
| Exon 8-10  | Sense              | agaagagttgatggccactg    |
| Exon 8-10  | Antisense          | agttaggggctgaagagacta   |
| Exon 34-36 | Sense              | tctcttctacacaagactc     |
| Exon 34-36 | Antisense          | gcctccagtttctggatctg    |
| Exon 21-24 | Sense              | ggaagcagatagcttggctg    |
| Exon 21-24 | Sense              | agcggaaactggagggtgac    |
| Exon 21-24 | Sense              | tcttacagaagagatggcag    |
| Exon 21-24 | Antisense          | ccttgttctccgtggcatg     |
| Exon 21-24 | Antisense          | atcatccacttgctgttctag   |
| Exon 21-24 | Antisense          | ctgcaactctttgatcttctc   |
